# Supplementary material for: Gene–Folic Acid Interactions and Risk of Conotruncal Heart Defects: Results from the National Birth Defects Prevention Study
Source: MDPI journal article supplement (doi:10.3390/genes14010180), 2023-01-09
Supplement: s1 [file s1]

Gene-folic acid interactions and risk of conotruncal heart defects: results from the National Birth Defects Prevention Study Daniel M. Webber, Ming Li, Stewart L. MacLeod, Xinyu Tang, Joseph W. Levy, Mohammad A. Karim, Stephen W. Erickson, Charlotte A. Hobbs\*, and the National Birth Defects Prevention Study \*Corresponding author: Charlotte A. Hobbs, E-mail: [chobbs@rchsd.org](mailto:chobbs@rchsd.org), phone: 858-966-8852

**Supplementary Figure S1. Linkage disequilibrium plots for variants with significant gene-folic acid interactions**

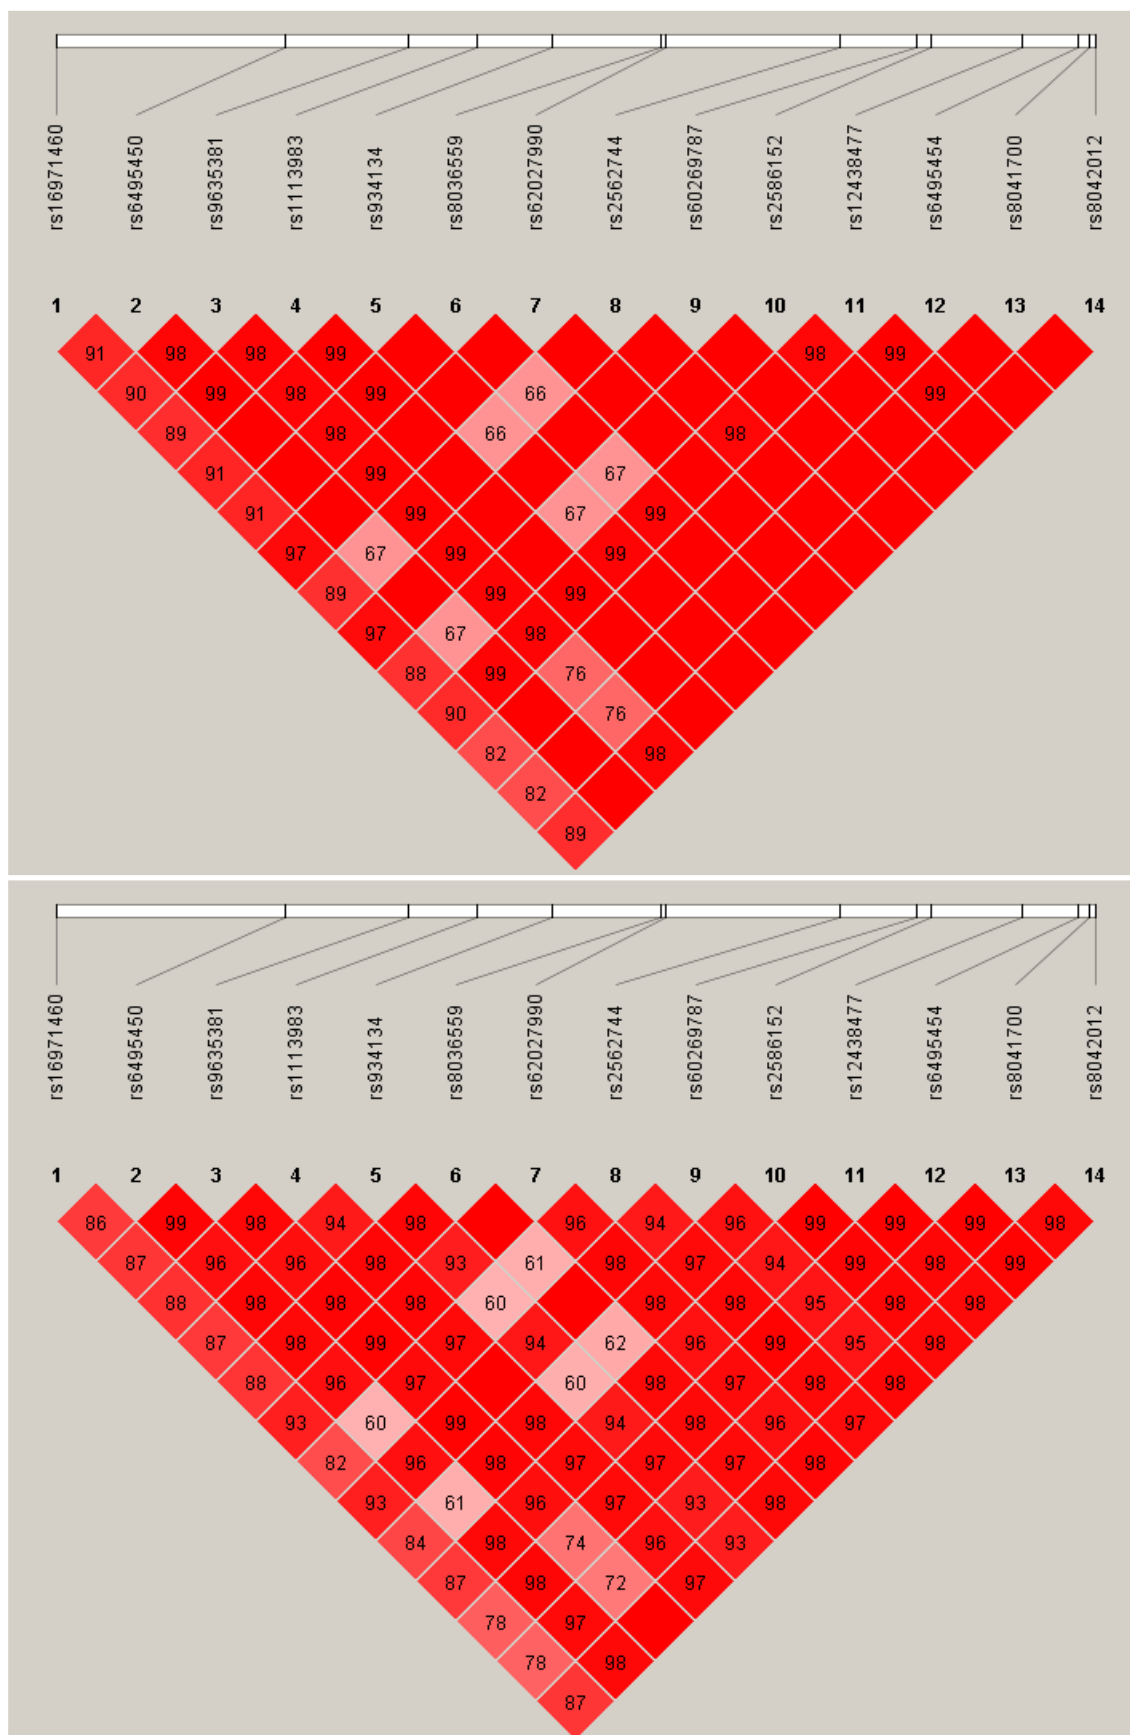

**Supplementary Figure S1A.** Linkage disequilibrium of variants with fetal gene-by-folate interactions in *MTHFS* from the discovery phase (top) and the replication phase (bottom).



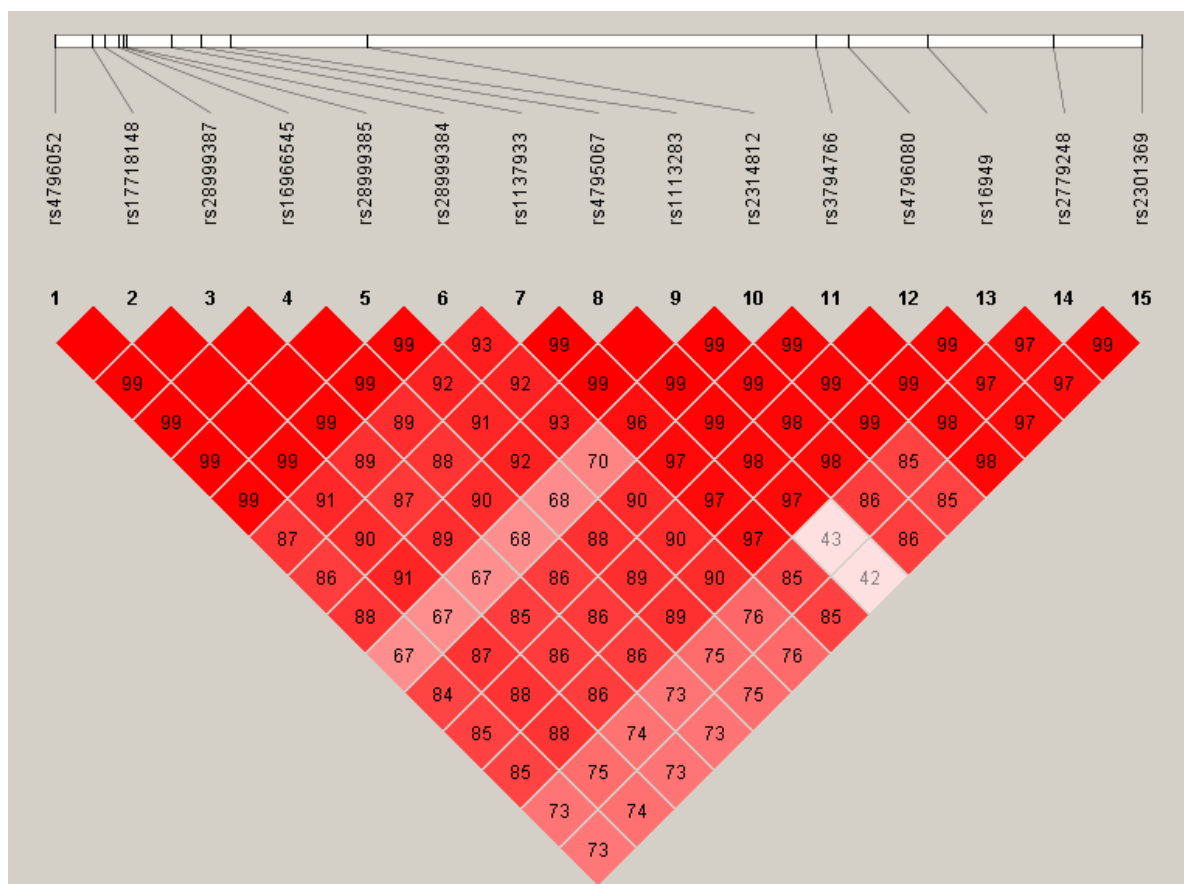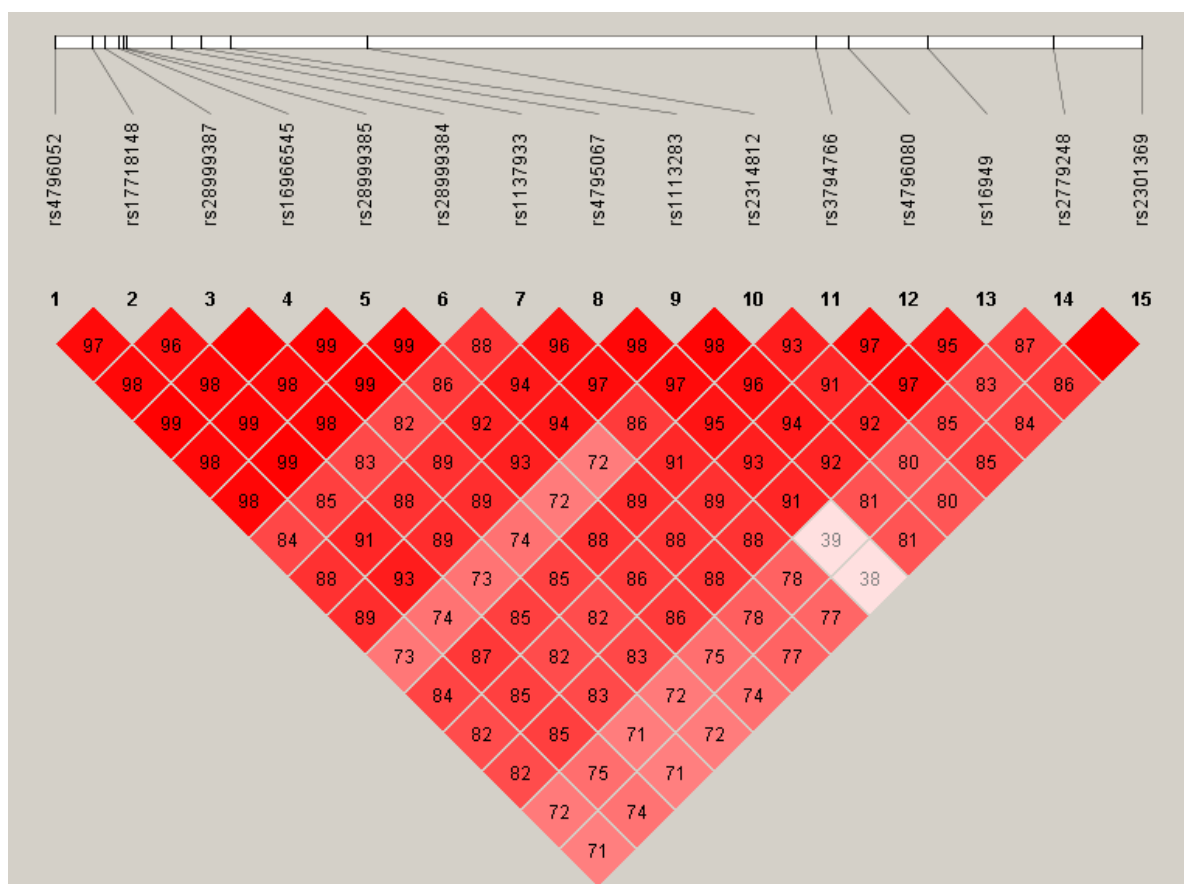

**Supplementary Figure S1C.** Linkage disequilibrium of variants with maternal gene-by-folate interactions in *NOS2* from the discovery phase (top) and the replication phase (bottom).

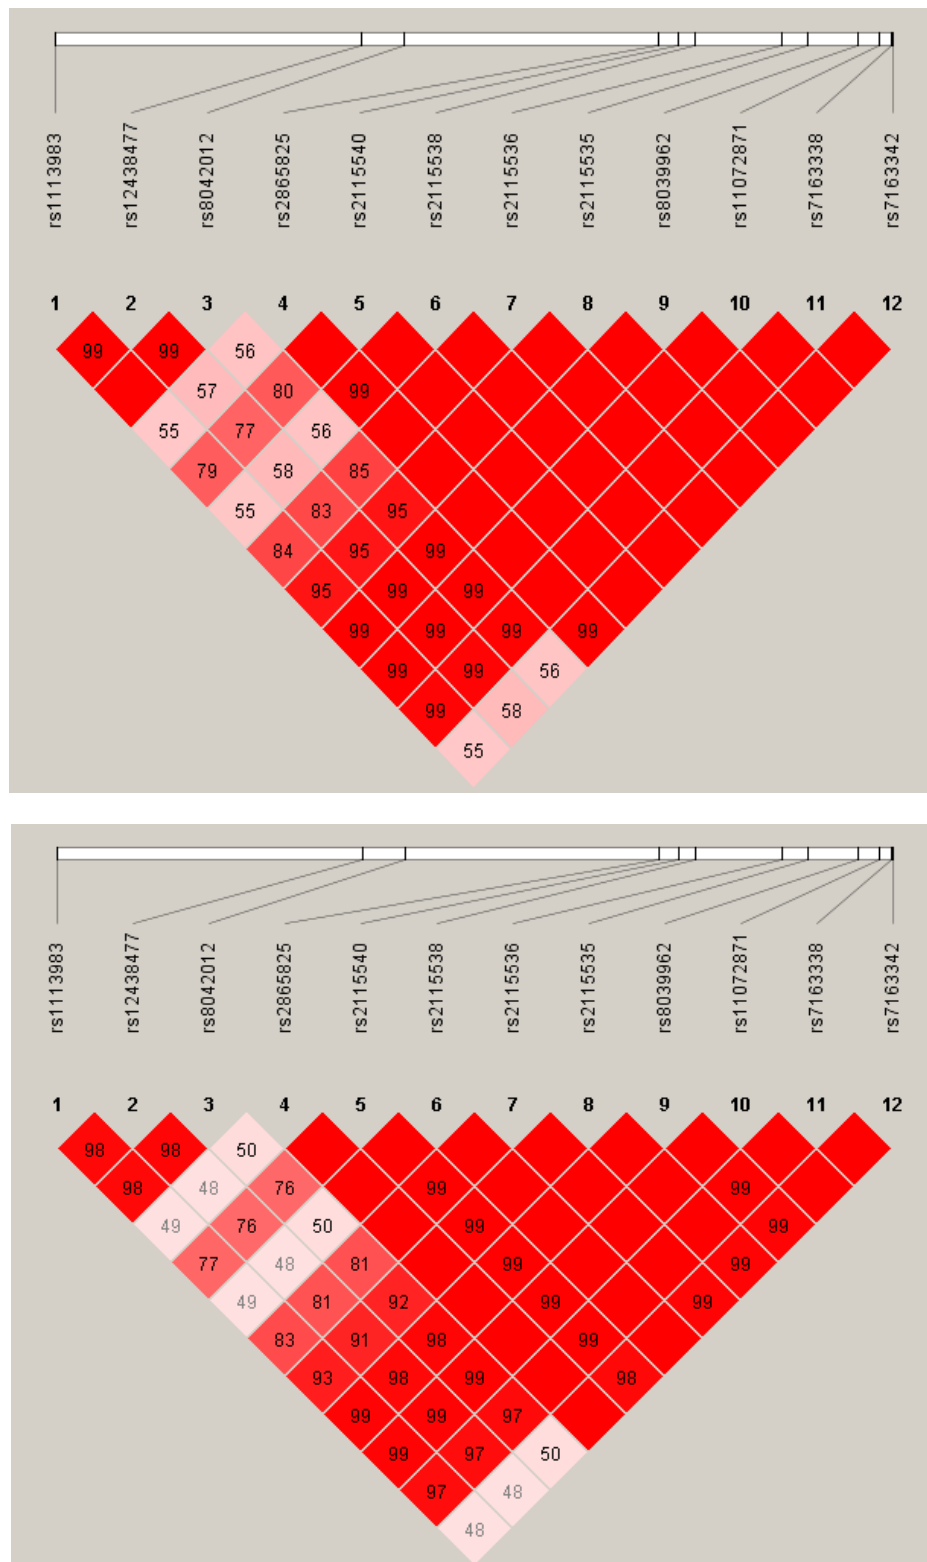

**Supplementary Figure S1D.** Linkage disequilibrium of variants with maternal gene-by-folate interactions in MTHFS from the discovery phase (top) and the replication phase (bottom).
