# Supplementary material for: Gene–Folic Acid Interactions and Risk of Conotruncal Heart Defects: Results from the National Birth Defects Prevention Study
Source: Genes (Basel). 2023 Jan 9;14(1):180. doi: 10.3390/genes14010180 (PMC9859210; doi:10.3390/genes14010180)
Supplement: Supplementary file 1 [file genes-14-00180-s001.zip]

Archive with 7 entries (7 files):
- Figure S1.pdf
- Figure S2.pdf
- Supplementary_methods.pdf
- Table_S1.xlsx
- Table_S2.xlsx
- Table_S3.xlsx
- Table_S4.xlsx
