# Supplementary material for: Gene–Folic Acid Interactions and Risk of Conotruncal Heart Defects: Results from the National Birth Defects Prevention Study
Source: Genes (Basel). 2023 Jan 9;14(1):180. doi: 10.3390/genes14010180 (PMC9859210; doi:10.3390/genes14010180)
Supplement: Supplementary file 1 [file genes-14-00180-s001.zip › Table_S1.xlsx]

## Sheet: Case_control_counts by study
Gene-folic acid interactions and risk of conotruncal heart defects: results from the National Birth Defects Prevention Study
Daniel M. Webber, Ming Li, Stewart L. MacLeod, Xinyu Tang, Joseph W. Levy, Mohammad A. Karim, Stephen W. Erickson, Charlotte A. Hobbs*, and the National Birth Defects Prevention Study
*Corresponding author: Charlotte A. Hobbs, E-mail: chobbs@rchsd.org, phone: 858-966-8852
Supplementary Table S1. Number of sequenced cases and controls by infant-parental-enrollment status and study phase.
	Discoverya			Replication			Combined
	Cases	Controls		Cases	Controls		Cases	Controls	Total Families
Mother-father-infant trio	97	29		230	2		328	32	360
Mother-infant dyad	44	4		8	0		52	3	55
Father-infant dyad	6	1		5	0		10	2	12
Mother-father	5	1		6	0		11	2	13
Mother only	9	1		2	0		10	0	10
Father only	1	0		0	4		1	1	2
Infant only	24	1		0	0		24	0	24
Total families	186	37		251	6		436	40	476
aThe discovery sample includes 4 partial families (2 singletons and 2 infant-parent diads) that were later completed in the replication phase and were included as a family unit in the combined sample.
