# Supplementary material for: Gene–Folic Acid Interactions and Risk of Conotruncal Heart Defects: Results from the National Birth Defects Prevention Study
Source: Genes (Basel). 2023 Jan 9;14(1):180. doi: 10.3390/genes14010180 (PMC9859210; doi:10.3390/genes14010180)
Supplement: Supplementary file 1 [file genes-14-00180-s001.zip › Table_S2.xlsx]

## Sheet: Discovery_sample
Gene-folic acid interactions and risk of conotruncal heart defects: results from the National Birth Defects Prevention Study
Daniel M. Webber, Ming Li, Stewart L. MacLeod, Xinyu Tang, Joseph W. Levy, Mohammad A. Karim, Stephen W. Erickson, Charlotte A. Hobbs*, and the National Birth Defects Prevention Study
*Corresponding author: Charlotte A. Hobbs, E-mail: chobbs@rchsd.org, phone: 858-966-8852
Supplementary Table S2. Maternal demographics by study phase. A. Demographics of sequenced participants in the discovery sample set.
		Cases mothers n (%)	Controls mothers n (%)
Age at delivery (years)		27.9 (5.2)	26.9 (5.6)
Race	Caucasian	131 (81.9%)	29 (18.1%)
	Hispanic	30 (96.8%)	1 (3.2%)
	African American	10 (83.3%)	2 (16.7%)
	Other	14 (87.5%)	2 (12.5%)
Education	Less than 12 years	16 (94.1%)	1 (5.9%)
	High school or equivalent	49 (81.7%)	11 (18.3%)
	1-3 years of college	53 (85.5%)	9 (14.5%)
	Bachelors or 4 years college	67 (83.8%)	13 (16.3%)
Household income	Less than $10,000	19 (90.5%)	2 (9.5%)
	$10,000 - $30,000	22 (75.9%)	7 (24.1%)
	$30,000 - $50,000	20 (83.3%)	4 (16.7%)
	Over $50,000	23 (85.2%)	4 (14.8%)
Prenatal folic acid supplementation	Unsupplemented	78 (88.6%)	10 (11.4%)
	Supplemented	107 (81.7%)	24 (18.3%)
Alcohol consumption	Unexposed	117 (84.2%)	22 (15.8%)
	Exposed	68 (85%)	12 (15%)
Cigarette smoking	Unexposed	148 (85.1%)	26 (14.9%)
	Exposed	37 (82.2%)	8 (17.8%)
Maternal BMI	Underweight (BMI < 18.5)	10 (83.3%)	2 (16.7%)
	Normal wt. (BMI 18.5-25)	84 (79.2%)	22 (20.8%)
	Overweight (BMI 25-30)	53 (88.3%)	7 (11.7%)
	Obese (BMI > 30)	35 (92.1%)	3 (7.9%)
	Missing	3 (100%)	0

## Sheet: Replication_sample
Gene-folic acid interactions and risk of conotruncal heart defects: results from the National Birth Defects Prevention Study
Daniel M. Webber, Ming Li, Stewart L. MacLeod, Xinyu Tang, Joseph W. Levy, Mohammad A. Karim, Stephen W. Erickson, Charlotte A. Hobbs*, and the National Birth Defects Prevention Study
*Corresponding author: Charlotte A. Hobbs, E-mail: chobbs@rchsd.org, phone: 858-966-8852
Supplementary table 2. Maternal demographics by study phase. B. Demographics of the replication sample set.
		Cases mothers n (%)	Controls mothers n (%)
Age at delivery (years)		28.6 (5.99)	29.0 (4.32)
Race	Caucasian	167 (67.1%)	4 (100%)
	Hispanic	45 (18.1%)	0
	African American	19 (7.6%)	0
	Other	18 (7.2%)	0
Education	Less than 12 years	29 (11.6%)	0
	High school or equivalent	51 (20.5%)	2 (50%)
	1-3 years of college	80 (32.1%)	1 (25%)
	Bachelors or 4 years college	89 (35.7%)	1 (25%)
Household income	Less than $10,000	27 (25.2%)	1 (33.3%)
	$10,000 - $30,000	35 (32.7%)	2 (66.7%)
	$30,000 - $50,000	19 (17.8%)	0
	Over $50,000	26 (24.3%)	0
Folic acid supplementation	Unexposed	98 (39.4%)	1 (25%)
	Exposed	151 (60.6%)	3 (75%)
Alcohol consumption	Unexposed	168 (67.5%)	2 (50%)
	Exposed	81 (32.5%)	2 (50%)
Cigarette smoking	Unexposed	216 (87.1%)	4 (100%)
	Exposed	32 (12.9%)	0
	Missing	1	0
Maternal BMI	Underweight (BMI < 18.5)	9 (3.7%)	0
	Normal wt. (BMI 18.5-25)	106 (43.8%)	3 (75%)
	Overweight (BMI 25-30)	63 (26.0%)	1 (25%)
	Obese (BMI > 30)	64 (26.4%)	0
	Missing	7	0
