# Supplementary material for: Gene–Folic Acid Interactions and Risk of Conotruncal Heart Defects: Results from the National Birth Defects Prevention Study
Source: Genes (Basel). 2023 Jan 9;14(1):180. doi: 10.3390/genes14010180 (PMC9859210; doi:10.3390/genes14010180)
Supplement: Supplementary file 1 [file genes-14-00180-s001.zip › Table_S3.xlsx]

## Sheet: Table S3
Gene-folic acid interactions and risk of conotruncal heart defects: results from the National Birth Defects Prevention Study
Daniel M. Webber, Ming Li, Stewart L. MacLeod, Xinyu Tang, Joseph W. Levy, Mohammad A. Karim, Stephen W. Erickson, Charlotte A. Hobbs*, and the National Birth Defects Prevention Study
*Corresponding author: Charlotte A. Hobbs, E-mail: chobbs@rchsd.org, phone: 858-966-8852
Supplementary Table S3. Distribution of cardiac phenotypes by reported folate supplementation during the early perinatal period
	Folate supplementation status
Heart defect	Supplemented	Unsupplemented	Total	Fisher's exact test
Conoventricular septal defect	10	13	23
Double outlet right ventricle	26	16	42
Interrupted aortic arch type B	3	4	7
Pulmonary atresia with VSD	14	7	21
Tetralogy of Fallot	107	68	175
Transposition of great arteries	84	54	138
Truncus arteriosus	8	8	16
Total	252	170	422	p-value = 0.59
Twelve case families are excluded from this table due to missing phenotypic data; these 12 cases met eligibility criteria and are included in subsequent analysis.
