# Supplementary material for: Gene–Folic Acid Interactions and Risk of Conotruncal Heart Defects: Results from the National Birth Defects Prevention Study
Source: Genes (Basel). 2023 Jan 9;14(1):180. doi: 10.3390/genes14010180 (PMC9859210; doi:10.3390/genes14010180)
Supplement: Supplementary file 1 [file genes-14-00180-s001.zip › Table_S4.xlsx]

## Sheet: Table S4a_fetal_SNPs
Gene-folic acid interactions and risk of conotruncal heart defects: results from the National Birth Defects Prevention Study
Daniel M. Webber, Ming Li, Stewart L. MacLeod, Xinyu Tang, Joseph W. Levy, Mohammad A. Karim, Stephen W. Erickson, Charlotte A. Hobbs*, and the National Birth Defects Prevention Study
*Corresponding author: Charlotte A. Hobbs, E-mail: chobbs@rchsd.org, phone: 858-966-8852
Supplementary table 4. Extended list of gene-by-folate interactions
Supplementary table 4a. Fetal gene-by-folate interactions in the discovery and replication phases
SNPs with fetal gene-by-folate interactions
Gene	SNP	Genomic location	Allele	Risk allele	Disc.	Rep.	Meta	Disc.	Rep.	Meta	Folate	Discovery	Replication	Meta
					p-value	p-value	p-value	BFDP	BFDP	BFDP	Status	95% CI	95% CI	95% CI
MTHFS	rs16971460	chr15:80157583	T>C	C	0.0252	0.0045	0.000599	0.9	0.9	0.61	Unexposed	1.50[1.02,2.19]	1.59[0.88,2.85]	1.52[1.11,2.10]
											Exposed	0.84[0.59,1.20]	0.53[0.32,0.86]	0.72[0.54,0.96]
	rs6495450	chr15:80162499	C>A	A	0.0392	0.0114	0.00186	0.9	0.88	0.58	Unexposed	1.17[0.88,1.55]	1.36[0.88,2.10]	1.22[0.96,1.54]
											Exposed	0.80[0.62,1.03]	0.67[0.48,0.94]	0.75[0.61,0.93]
	rs9635381	chr15:80165143	A>G	G	0.00927	0.037	0.000917	0.86	0.93	0.63	Unexposed	1.66[1.16,2.38]	1.15[0.65,2.03]	1.50[1.11,2.03]
											Exposed	0.89[0.63,1.25]	0.52[0.32,0.85]	0.75[0.56,0.99]
	rs1113983	chr15:80166597	C>A	A	0.000839	0.0217	5.09e-05	0.57	0.91	0.15	Unexposed	1.59[1.19,2.12]	1.32[0.84,2.05]	1.49[1.18,1.92]
											Exposed	0.84[0.65,1.11]	0.68[0.48,0.97]	0.78[0.63,0.97]
	rs934134	chr15:80168218	T>C	C	0.0359	0.0455	0.00444	0.89	0.92	0.7	Unexposed	1.16[0.87,1.54]	1.24[0.79,1.94]	1.18[0.93,1.50]
											Exposed	0.79[0.61,1.02]	0.70[0.50,0.99]	0.76[0.62,0.93]
	rs8036559	chr15:80170563	C>T	T	0.0367	0.0313	0.00338	0.89	0.91	0.66	Unexposed	1.16[0.87,1.54]	1.26[0.82,1.94]	1.19[0.93,1.52]
											Exposed	0.79[0.61,1.02]	0.70[0.50,0.98]	0.76[0.62,0.93]
	rs62027990	chr15:80170638	G>A	A	0.0409	0.019	0.00314	0.92	0.93	0.79	Unexposed	1.44[0.95,2.18]	1.69[0.80,3.55]	1.49[1.04,2.13]
											Exposed	0.82[0.56,1.19]	0.56[0.33,0.96]	0.72[0.53,0.98]
	rs2562744	chr15:80174388	C>A	C	0.0261	0.00594	0.000761	0.88	0.86	0.45	Unexposed	1.46[1.09,1.96]	1.36[0.88,2.09]	1.43[1.12,1.82]
											Exposed	0.98[0.76,1.26]	0.63[0.44,0.89]	0.84[0.68,1.03]
	rs2586152	chr15:80176349	C>T	C	0.0263	0.0118	0.00121	0.88	0.88	0.52	Unexposed	1.46[1.09,1.96]	1.39[0.90,2.15]	1.45[1.14,1.82]
											Exposed	0.98[0.76,1.26]	0.69[0.49,0.97]	0.86[0.70,1.05]
	rs12438477a	chr15:80178283	C>A	A	0.00138	0.00858	4.02e-05	0.61	0.88	0.12	Unexposed	1.49[1.12,1.97]	1.26[0.81,1.95]	1.41[1.11,1.79]
											Exposed	0.83[0.65,1.07]	0.59[0.41,0.85]	0.74[0.61,0.92]
	rs6495454	chr15:80179496	G>A	A	0.00227	0.0219	0.000146	0.7	0.91	0.27	Unexposed	1.50[1.11,2.03]	1.36[0.83,2.22]	1.47[1.14,1.89]
											Exposed	0.83[0.64,1.09]	0.65[0.44,0.97]	0.78[0.62,0.96]
	rs8041700	chr15:80179737	A>G	G	0.00228	0.0283	0.000174	0.7	0.91	0.28	Unexposed	1.50[1.11,2.03]	1.33[0.85,2.10]	1.45[1.13,1.86]
											Exposed	0.83[0.64,1.09]	0.70[0.49,1.00]	0.78[0.63,0.97]
	rs8042012a	chr15:80179847	C>T	T	0.00271	0.0147	0.00012	0.71	0.89	0.22	Unexposed	1.52[1.14,2.04]	1.26[0.81,1.96]	1.43[1.12,1.82]
											Exposed	0.86[0.66,1.13]	0.63[0.44,0.90]	0.77[0.62,0.95]
TCN2	rs9621047	chr22:31004127	G>A	A	0.0282	0.00389	0.000611	0.88	0.85	0.43	Unexposed	1.06[0.79,1.41]	1.73[1.12,2.66]	1.23[0.97,1.56]
											Exposed	0.70[0.54,0.90]	0.77[0.54,1.09]	0.72[0.59,0.88]
	rs740233	chr22:31007919	A>G	G	0.0162	0.00875	0.000529	0.85	0.87	0.41	Unexposed	1.01[0.76,1.35]	1.66[1.09,2.53]	1.19[0.93,1.51]
											Exposed	0.64[0.50,0.83]	0.80[0.57,1.14]	0.70[0.57,0.86]
	rs5749134	chr22:31010242	G>C	C	0.0356	0.0134	0.00181	0.89	0.89	0.59	Unexposed	1.09[0.81,1.46]	1.61[1.05,2.46]	1.23[0.97,1.56]
											Exposed	0.73[0.57,0.95]	0.80[0.56,1.15]	0.76[0.61,0.93]
	rs5997703	chr22:31010556	C>G	G	0.0356	0.00942	0.00145	0.89	0.88	0.56	Unexposed	1.09[0.81,1.46]	1.76[1.14,2.73]	1.26[0.99,1.61]
											Exposed	0.73[0.57,0.95]	0.84[0.59,1.20]	0.77[0.63,0.94]
	rs5749135	chr22:31011906	C>T	T	0.0412	0.0134	0.00238	0.9	0.9	0.63	Unexposed	1.09[0.82,1.46]	1.78[1.13,2.81]	1.27[0.98,1.61]
											Exposed	0.75[0.58,0.96]	0.84[0.57,1.24]	0.78[0.63,0.95]
	rs740235	chr22:31013549	G>A	A	0.0418	0.0324	0.00397	0.9	0.91	0.69	Unexposed	1.09[0.81,1.46]	1.46[0.96,2.23]	1.20[0.94,1.54]
											Exposed	0.75[0.58,0.96]	0.80[0.56,1.15]	0.76[0.62,0.94]
	rs4820888	chr22:31017322	A>G	G	0.0128	0.0193	0.000749	0.83	0.9	0.45	Unexposed	1.14[0.86,1.52]	1.41[0.94,2.10]	1.22[0.97,1.54]
											Exposed	0.72[0.56,0.93]	0.74[0.52,1.07]	0.73[0.59,0.89]
	rs13056378	chr22:31017343	T>C	C	0.0363	0.0178	0.00227	0.89	0.9	0.62	Unexposed	1.10[0.82,1.47]	1.55[1.01,2.38]	1.23[0.96,1.56]
											Exposed	0.74[0.58,0.96]	0.79[0.55,1.14]	0.76[0.62,0.93]
	rs13055009	chr22:31017403	C>T	T	0.037	0.0171	0.00227	0.9	0.9	0.62	Unexposed	1.10[0.82,1.47]	1.59[1.04,2.46]	1.23[0.97,1.56]
											Exposed	0.74[0.58,0.96]	0.81[0.57,1.16]	0.76[0.62,0.94]
	rs5749137	chr22:31017740	G>T	T	0.0338	0.0236	0.0026	0.89	0.91	0.64	Unexposed	1.10[0.83,1.48]	1.55[1.00,2.40]	1.22[0.96,1.56]
											Exposed	0.74[0.58,0.96]	0.81[0.56,1.16]	0.76[0.62,0.93]
	rs5753246	chr22:31017777	T>C	C	0.0381	0.0446	0.00436	0.9	0.92	0.7	Unexposed	1.12[0.84,1.51]	1.32[0.88,1.97]	1.19[0.94,1.51]
											Exposed	0.76[0.58,0.99]	0.76[0.53,1.09]	0.76[0.62,0.94]
	rs5753247	chr22:31018225	T>C	C	0.026	0.0275	0.00211	0.88	0.91	0.6	Unexposed	1.11[0.84,1.48]	1.34[0.89,2.03]	1.18[0.93,1.49]
											Exposed	0.74[0.57,0.95]	0.73[0.51,1.05]	0.74[0.60,0.90]
	rs7286680	chr22:31018561	T>G	G	0.0323	0.00979	0.00136	0.89	0.88	0.55	Unexposed	1.11[0.83,1.48]	1.67[1.08,2.58]	1.26[0.99,1.60]
											Exposed	0.74[0.58,0.96]	0.79[0.55,1.15]	0.76[0.62,0.93]
	rs2301955	chr22:31018646	C>T	T	0.0323	0.05	0.00418	0.89	0.92	0.7	Unexposed	1.11[0.83,1.48]	1.52[0.99,2.34]	1.22[0.96,1.56]
											Exposed	0.74[0.58,0.96]	0.87[0.60,1.25]	0.78[0.63,0.96]
	rs2301957	chr22:31018817	C>T	T	0.0122	0.0104	0.000466	0.83	0.88	0.39	Unexposed	1.14[0.86,1.52]	1.55[1.01,2.39]	1.25[0.99,1.59]
											Exposed	0.72[0.56,0.92]	0.75[0.52,1.08]	0.73[0.59,0.89]
	rs114307581	chr22:31019235	A>C	C	0.0434	0.0334	0.0044	0.9	0.92	0.71	Unexposed	1.09[0.81,1.46]	1.56[1.00,2.42]	1.22[0.95,1.55]
											Exposed	0.75[0.58,0.96]	0.84[0.58,1.22]	0.77[0.63,0.95]
	rs4820890	chr22:31019457	A>G	G	0.0412	0.0451	0.00547	0.9	0.93	0.74	Unexposed	1.11[0.83,1.48]	1.38[0.88,2.16]	1.18[0.92,1.50]
											Exposed	0.76[0.59,0.97]	0.73[0.48,1.12]	0.75[0.60,0.93]
	rs5753249	chr22:31020090	C>T	T	0.0328	0.0143	0.00216	0.89	0.91	0.63	Unexposed	1.11[0.83,1.48]	1.65[1.02,2.66]	1.23[0.96,1.59]
											Exposed	0.74[0.58,0.95]	0.74[0.48,1.13]	0.74[0.60,0.92]
	rs10418	chr22:31022952	C>T	T	0.0318	0.0133	0.00144	0.9	0.9	0.61	Unexposed	1.45[1.03,2.06]	1.66[1.05,2.62]	1.52[1.15,2.00]
											Exposed	0.9[0.68,1.21]	0.77[0.52,1.15]	0.85[0.68,1.09]
	rs7289553	chr22:31024856	A>G	G	0.0415	0.0271	0.00406	0.9	0.92	0.7	Unexposed	1.14[0.86,1.52]	1.30[0.82,2.06]	1.18[0.93,1.51]
											Exposed	0.79[0.62,1.01]	0.65[0.43,0.98]	0.75[0.61,0.93]
aSNPs with fetal and maternal gene-by-folate interactions.

## Sheet: Table S4b_maternal_SNPs
Gene-folic acid interactions and risk of conotruncal heart defects: results from the National Birth Defects Prevention Study
Daniel M. Webber, Ming Li, Stewart L. MacLeod, Xinyu Tang, Joseph W. Levy, Mohammad A. Karim, Stephen W. Erickson, Charlotte A. Hobbs*, and the National Birth Defects Prevention Study
*Corresponding author: Charlotte A. Hobbs, E-mail: chobbs@rchsd.org, phone: 858-966-8852
Supplementary Table S4. Extended list of gene-by-folate interactions
Supplementary table 4b. Maternal gene-by-folate interactions in the discovery and replication phases
SNPs with maternal gene-by-folate interactions
Gene	SNP	Location	Allele	Risk allele	Disc.	Rep.	Meta	Disc.	Rep.	Meta	Folate	Discovery	Replication	Meta
					p-value	p-value	p-value	BFDP	BFDP	BFDP	Status	95% CI	95% CI	95% CI
NOS2	rs17718148	chr17:26103990	C>T	T	0.00496	0.0485	0.000604	0.82	0.93	0.56	Unexposed	1.20[0.85,1.69]	1.53[0.89,2.65]	1.28[0.96,1.72]
											Exposed	0.62[0.45,0.85]	0.74[0.46,1.19]	0.65[0.50,0.85]
	rs28999387	chr17:26104286	C>T	T	0.00514	0.0425	0.000557	0.82	0.93	0.55	Unexposed	1.20[0.85,1.70]	1.60[0.94,2.74]	1.32[0.98,1.75]
											Exposed	0.62[0.45,0.86]	0.77[0.48,1.23]	0.67[0.51,0.87]
	rs28999384	chr17:26104823	C>T	T	0.00286	0.0322	0.000249	0.79	0.93	0.47	Unexposed	1.28[0.90,1.81]	1.83[1.03,3.27]	1.41[1.04,1.89]
											Exposed	0.63[0.45,0.87]	0.81[0.50,1.30]	0.68[0.52,0.88]
	rs1137933	chr17:26105932	G>A	A	0.00753	0.0238	0.000493	0.85	0.92	0.54	Unexposed	1.29[0.89,1.87]	1.76[1.02,3.03]	1.43[1.05,1.92]
											Exposed	0.67[0.49,0.92]	0.80[0.52,1.21]	0.71[0.56,0.92]
	rs4795067	chr17:26106675	A>G	G	0.0384	0.00854	0.00151	0.9	0.88	0.56	Unexposed	1.17[0.88,1.58]	1.48[0.95,2.31]	1.26[0.99,1.61]
											Exposed	0.80[0.62,1.01]	0.70[0.49,0.99]	0.76[0.62,0.93]
	rs1113283	chr17:26107398	C>T	T	0.00562	0.00335	9.23e-05	0.81	0.88	0.29	Unexposed	1.30[0.93,1.81]	1.96[1.14,3.36]	1.45[1.10,1.92]
											Exposed	0.71[0.53,0.94]	0.71[0.47,1.08]	0.71[0.56,0.89]
	rs2314812	chr17:26110814	C>T	T	0.0429	0.0303	0.00407	0.91	0.93	0.77	Unexposed	1.21[0.84,1.75]	1.72[0.94,3.13]	1.33[0.97,1.82]
											Exposed	0.73[0.53,1.01]	0.74[0.47,1.18]	0.74[0.56,0.96]
	rs3794766	chr17:26121921	C>T	T	0.00649	0.00997	0.000224	0.83	0.9	0.4	Unexposed	1.35[0.97,1.89]	1.81[1.07,3.07]	1.47[1.11,1.96]
											Exposed	0.73[0.54,0.99]	0.75[0.50,1.14]	0.74[0.58,0.94]
	rs4796080	chr17:26122737	A>G	G	0.023	0.00897	0.000769	0.89	0.9	0.58	Unexposed	1.19[0.83,1.72]	1.72[1.03,2.88]	1.35[1.00,1.81]
											Exposed	0.69[0.51,0.94]	0.71[0.46,1.08]	0.70[0.54,0.90]
	rs16949	chr17:26124699	T>C	C	0.0182	0.00661	0.000477	0.89	0.89	0.54	Unexposed	1.23[0.85,1.78]	1.80[1.06,3.07]	1.39[1.03,1.89]
											Exposed	0.69[0.51,0.95]	0.70[0.46,1.08]	0.70[0.54,0.90]
	rs2779248	chr17:26127832	T>C	C	0.00161	0.0223	0.000102	0.65	0.91	0.21	Unexposed	1.40[1.05,1.87]	1.18[0.76,1.82]	1.33[1.04,1.69]
											Exposed	0.77[0.60,0.99]	0.59[0.40,0.89]	0.72[0.58,0.89]
	rs2301369	chr17:26129996	G>C	C	0.00447	0.0241	0.000313	0.75	0.91	0.35	Unexposed	1.35[1.01,1.80]	1.14[0.74,1.76]	1.28[1.01,1.64]
											Exposed	0.79[0.62,1.01]	0.58[0.38,0.87]	0.73[0.59,0.90]
MTHFS	rs12438477a	chr15:80178283	C>A	A	0.0103	0.0429	0.00108	0.82	0.91	0.49	Unexposed	0.65[0.48,0.88]	0.80[0.56,1.14]	0.71[0.56,0.89]
											Exposed	1.06[0.84,1.35]	1.30[0.95,1.79]	1.15[0.94,1.39]
	rs8042012a	chr15:80179847	C>T	T	0.026	0.0438	0.0027	0.88	0.91	0.64	Unexposed	0.65[0.48,0.88]	0.79[0.55,1.13]	0.70[0.56,0.89]
											Exposed	1.01[0.78,1.30]	1.28[0.93,1.77]	1.11[0.91,1.35]
	rs2115540	chr15:80190308	A>G	A	0.0336	0.0436	0.00376	0.89	0.92	0.67	Unexposed	1.18[0.89,1.55]	1.36[0.93,2.00]	1.24[0.99,1.55]
											Exposed	0.80[0.63,1.02]	0.81[0.58,1.14]	0.81[0.66,0.98]
	rs2115536	chr15:80194247	C>T	C	0.0182	0.0462	0.0021	0.86	0.92	0.59	Unexposed	1.21[0.92,1.59]	1.38[0.94,2.04]	1.27[1.01,1.59]
											Exposed	0.79[0.62,1.00]	0.82[0.59,1.15]	0.80[0.66,0.97]
	rs2115535	chr15:80195199	G>A	G	0.0242	0.0148	0.00121	0.87	0.88	0.5	Unexposed	1.24[0.94,1.64]	1.46[0.99,2.15]	1.32[1.05,1.64]
											Exposed	0.83[0.66,1.05]	0.77[0.55,1.08]	0.81[0.67,0.98]
	rs8039962	chr15:80197122	T>C	T	0.0196	0.0122	0.0008	0.86	0.87	0.43	Unexposed	1.26[0.96,1.65]	1.39[0.97,2.01]	1.30[1.05,1.62]
											Exposed	0.83[0.65,1.05]	0.74[0.53,1.04]	0.80[0.66,0.97]
	rs11072871	chr15:80197931	T>C	T	0.0179	0.00835	0.000554	0.85	0.86	0.38	Unexposed	1.26[0.96,1.66]	1.43[0.99,2.06]	1.32[1.06,1.64]
											Exposed	0.83[0.65,1.05]	0.73[0.52,1.03]	0.79[0.65,0.96]
	rs7163338	chr15:80198408	C>G	C	0.0157	0.00615	0.000397	0.85	0.85	0.34	Unexposed	1.27[0.96,1.67]	1.49[1.02,2.17]	1.34[1.07,1.67]
											Exposed	0.82[0.65,1.05]	0.73[0.52,1.03]	0.79[0.65,0.96]
	rs7163342	chr15:80198417	C>T	T	0.0494	0.046	0.00598	0.91	0.93	0.78	Unexposed	0.90[0.63,1.28]	0.60[0.37,0.99]	0.79[0.59,1.05]
											Exposed	1.39[1.06,1.83]	1.15[0.77,1.72]	1.32[1.04,1.64]
aSNPs with fetal and maternal gene-by-folate interactions.
