# Supplementary figures and images for: Gene–Folic Acid Interactions and Risk of Conotruncal Heart Defects: Results from the National Birth Defects Prevention Study
Source: MDPI journal article supplement (doi:10.3390/genes14010180), 2023-01-09

## Supplementary Figure S2. Workflow for gene-folic acid interaction analysis

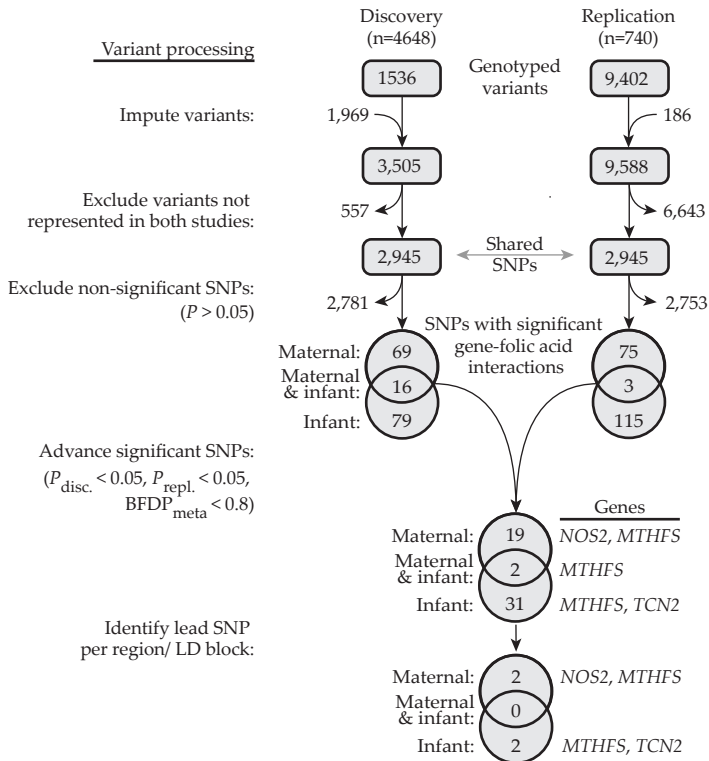

Supplement: s1 [file s1]
